# Supplementary material for: Magnetic nanoparticle-conjugated polymeric micelles for combined hyperthermia and chemotherapy
Source: Royal Society of Chemistry journal article supplement (doi:10.1039/c5nr04130a), 2015-01-01

### Electronic Supplementary Information

Fig S1. Layout(a) and photographs of the heat induction system (b).

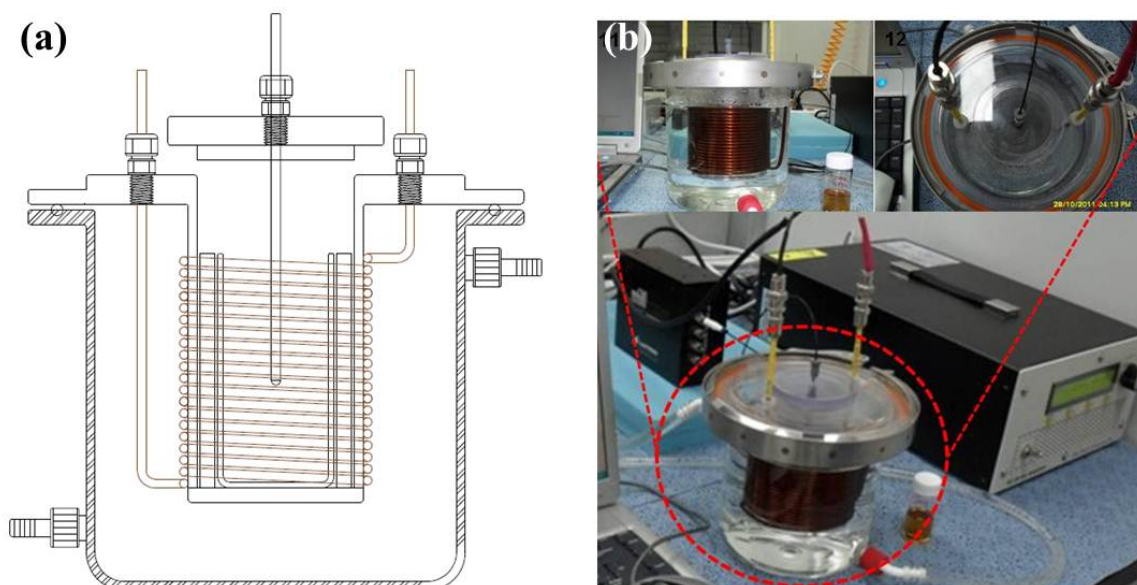

Fig S2. UV- Vis spectra with DOX concentrations in DMF (a) and calibration curve obtained from standard DOX solutions (b).

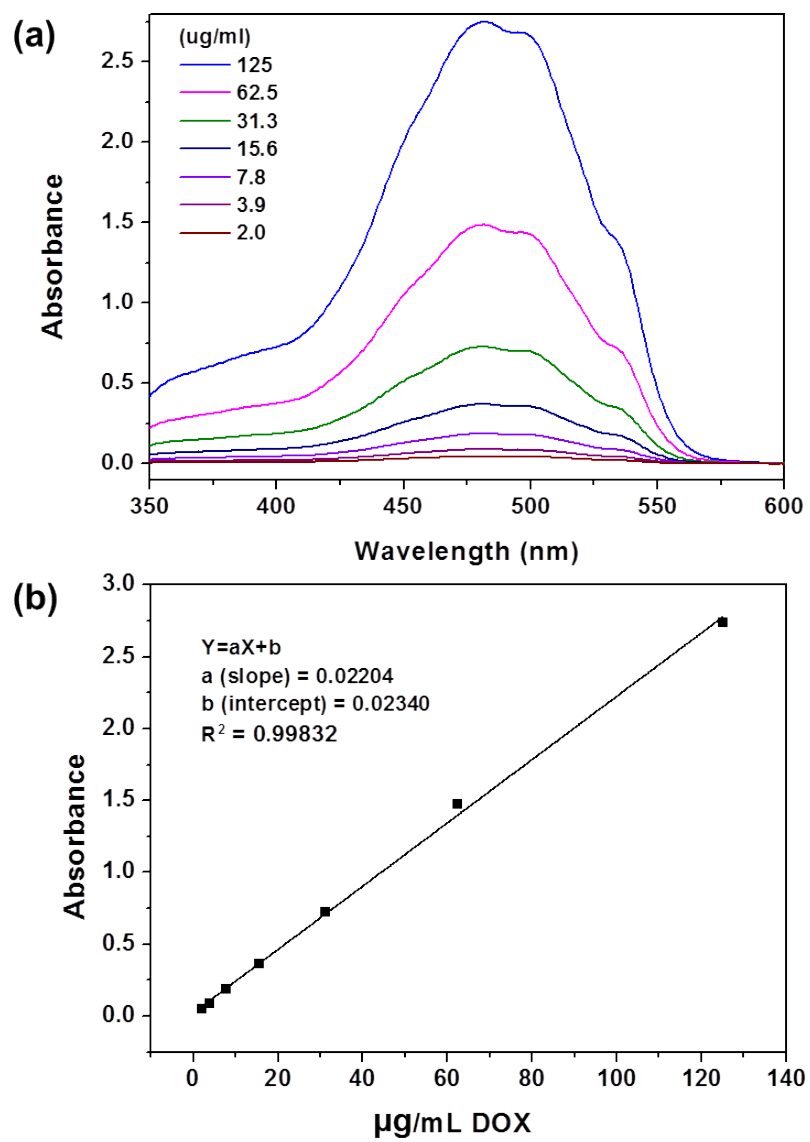

Fig S3. TGA curves of NH<sub>2</sub>-PLA-PEG, CA-MNPs and MNPs-PLA-PEG.

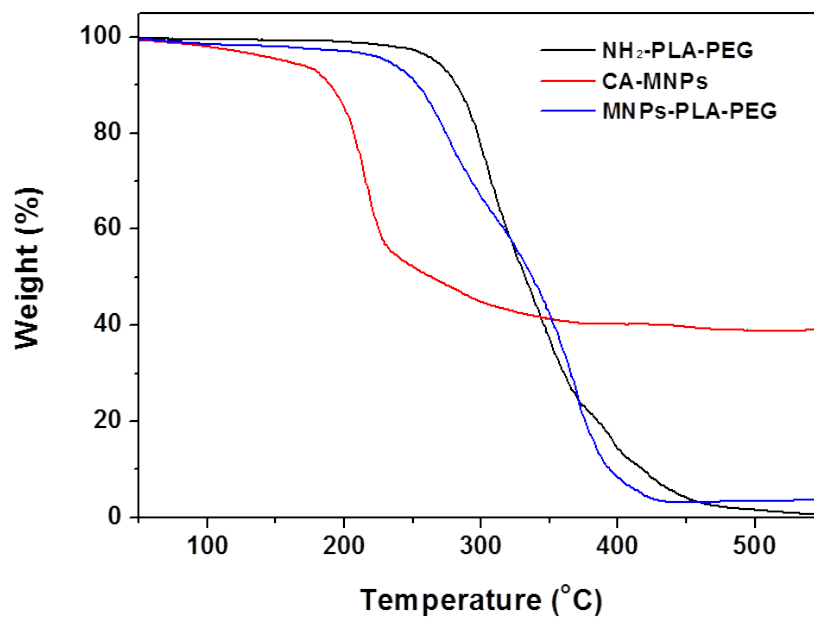

Fig S4. Magnetization curves of citric acid-coated magnetic nanoparticles (CA-MNPs) (a) and magnetic nanoparticles conjugated-poly(ethylene glycol)-poly(lactide) (MNPs-PLA-PEG) (b) measured on a vibrating sample magnetometer.

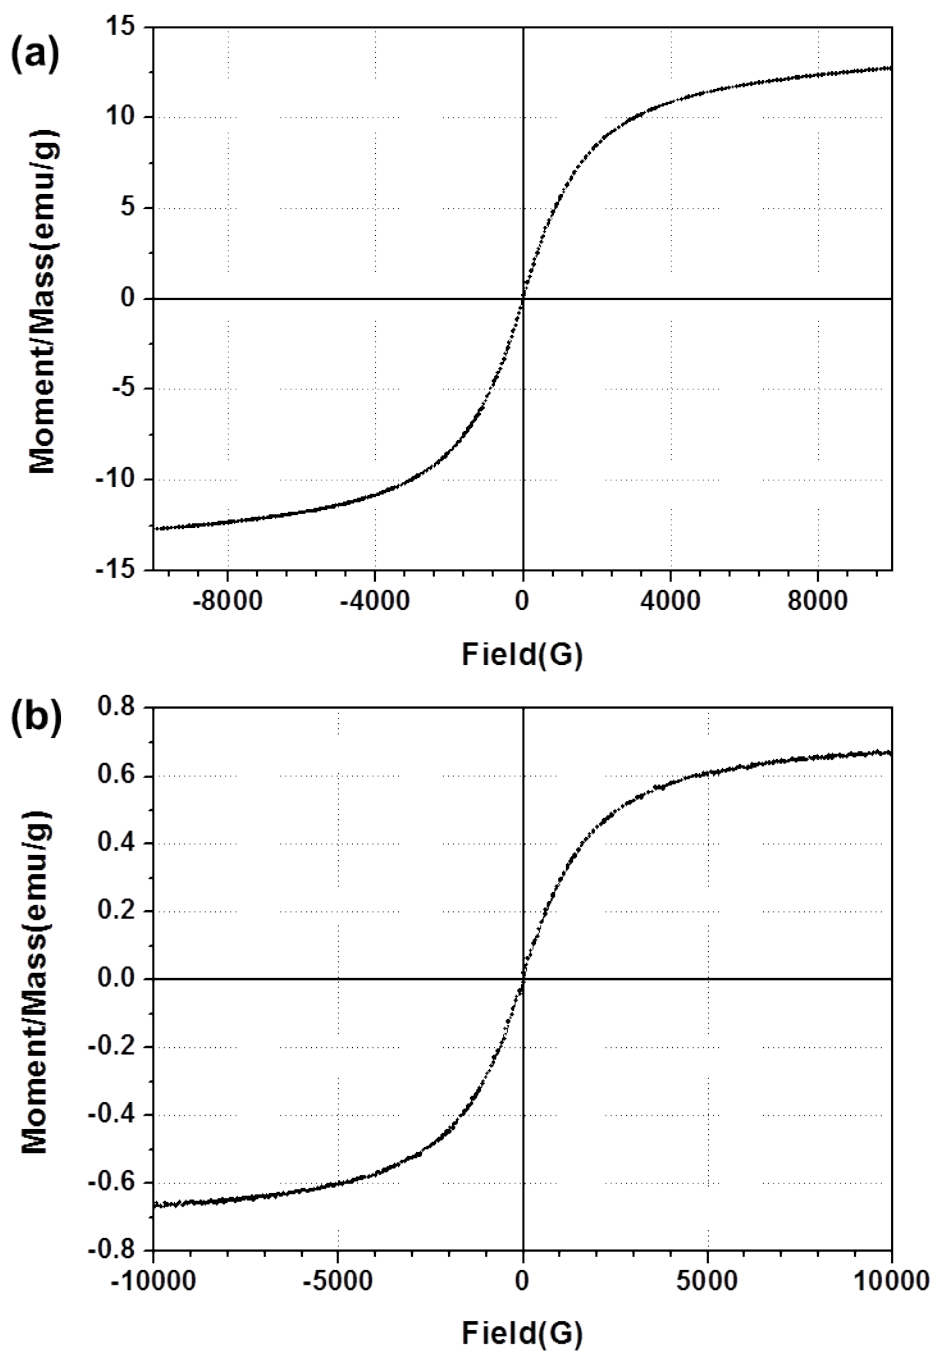

Fig S5. DSC diagram of MNPs-PLA-PEG.

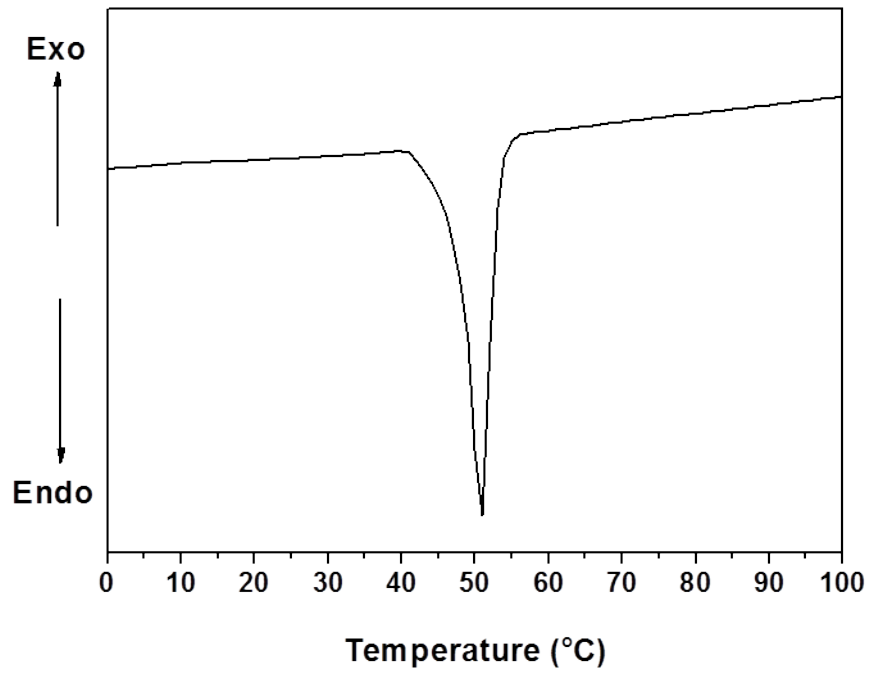

Supplement: c5nr04130a1.pdf [file c5nr04130a1.pdf]
